# Supplementary material for: Inflammatory breast cancer tumor emboli express high levels of anti-apoptotic proteins: use of a quantitative high content and high-throughput 3D IBC spheroid assay to identify targeting strategies
Source: PubMed Central journal article supplement (PMC5432221; doi:10.18632/oncotarget.15667), 2017-02-24
Supplement: oncotarget-08-25848-s001.pdf [file oncotarget-08-25848-s001.pdf]

## Inflammatory breast cancer tumor emboli express high levels of anti-apoptotic proteins: use of a quantitative high content and high-throughput 3D IBC spheroid assay to identify targeting strategies

### SUPPLEMENTARY MATERIALS

### SUPPLEMENTARY FIGURE

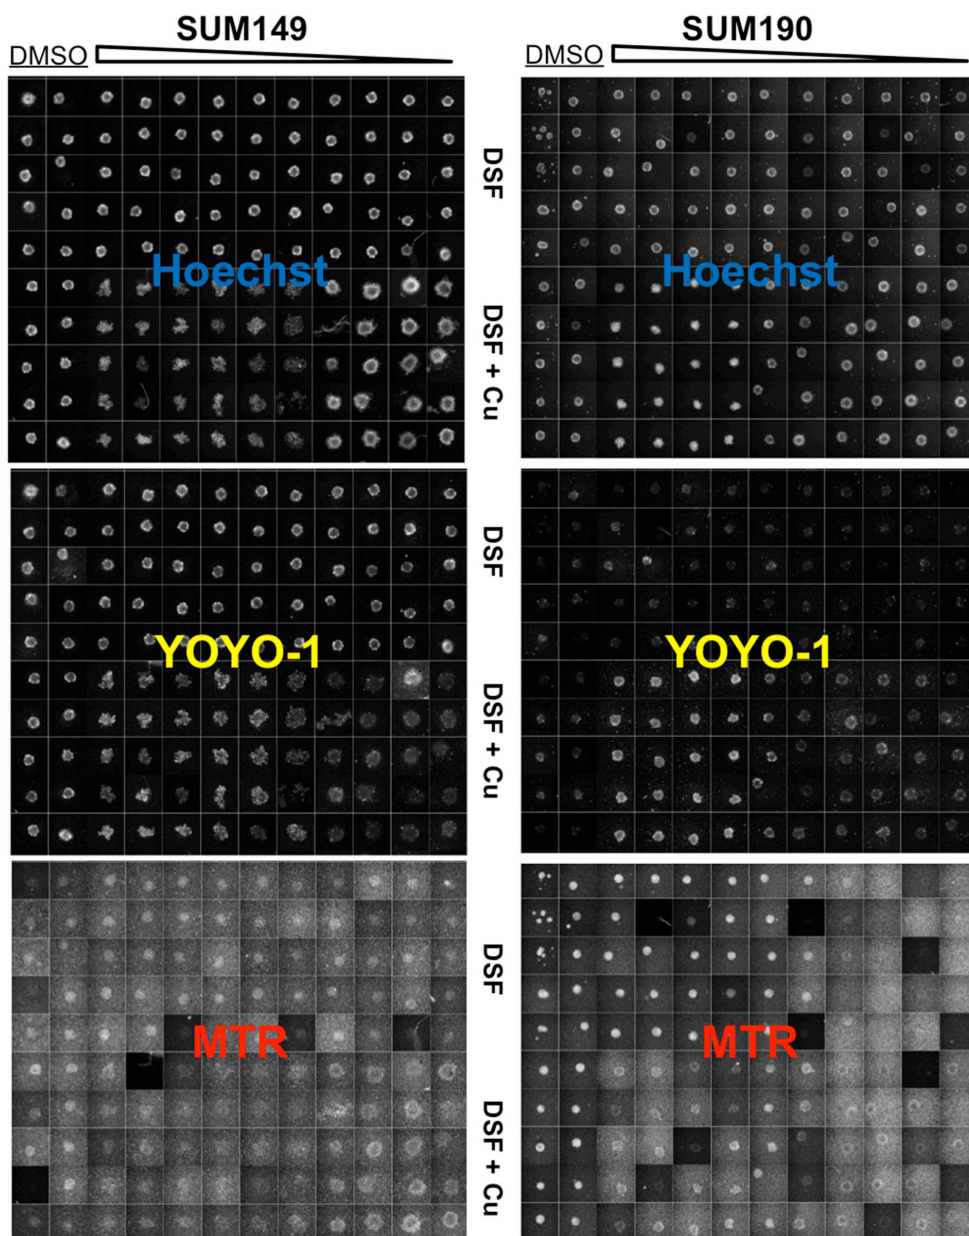

**Supplementary Figure 1: Multi-well plate map for high content and high-throughput analysis.** Representative images of the 384-well plate map for SUM149 and SUM199 shown to indicate the presence of single spheroid in each well with DMSO, DSF, Cu, or DSF-Cu treatments and corresponding dye used for the quantitative high content imaging analysis.
